# Supplementary material for: Novel Lactone-Based Insecticides and Drosophila suzukii Management: Synthesis, Potential Action Mechanisms and Selectivity for Non-Target Parasitoids
Source: MDPI journal article supplement (doi:10.3390/insects14080697), 2023-08-09
Supplement: s1 [file s1]

**Supplementary Table S1.** Lactone derivative compounds.

| Molecule Identification <sup>1</sup> | Molecular Structure                                                                  | Molecule Name                                                                                                                 |
|--------------------------------------|--------------------------------------------------------------------------------------|-------------------------------------------------------------------------------------------------------------------------------|
| (rac)-1                              | 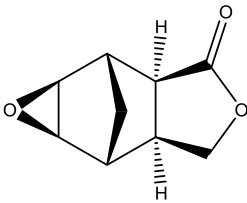   | (3aS,4R,5R,6S,7S,7aS)- and (3aR,4S,5S,6R,7R,7aR)-5,6-epoxyhexahydro-4,7-methanoisobenzofuran-1(3H)-one                        |
| (rac)-2                              |    | (3aS,4R,7S,7aR)- and (3aR,4S,7R,7aS)-hexahydro-4,7-methanoisobenzofuran-1(3H)-one                                             |
| (rac)-3                              |    | (3aS,4S,7R,7aR)- and (3aR,4R,7S,7aS)-3a,4,7,7a-tetrahydro-4,7-methanoisobenzofuran-1(3H)-one                                  |
| 4                                    |   | furan-2(5H)-one                                                                                                               |
| (rac)-5                              |  | (3aR,4R,7S,7aS)- and (3aS,4S,7R,7aR)-hexahydro-4,7-methanoisobenzofuran-1(3H)-one                                             |
| 6                                    |  | (3S,3aS,4R,7S,7aR)-3-(((1S,2R,5S)-2-isopropyl-5-methylcyclohexyl)oxy)-3a,4,7,7a-tetrahydro-4,7-methanoisobenzofuran-1(3H)-one |
| (rac)-7                              |  | (3aR,4R,5R,6S,7S,7aR)- and (3aS,4S,5S,6R,7R,7aS)-5,6-epoxyhexahydro-4,7-methanoisobenzofuran-1(3H)-one                        |

(rac)-8

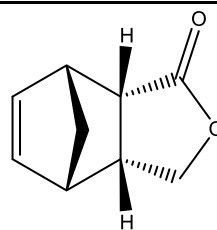

(3aR,4S,7R,7aS)- and  
(3aS,4R,7S,7aR)-3a,4,7,7a-  
tetrahydro-4,7  
methanoisobenzofuran-  
1(3H)-one

9

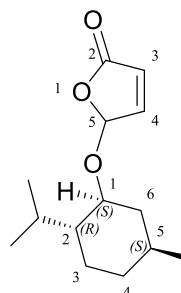

5-(((1S,2R,5S)-2-isopropyl-5-  
methylcyclohexyl)oxy)furan-  
2(5H)-one

<sup>1</sup> All compounds named (rac) are racemic mixtures.
